# Supplementary material for: Slow relaxation of magnetization for a Tb derivative in a biradical-based lanthanide chain
Source: Royal Society of Chemistry journal article supplement (doi:10.1039/d0nj00188k), 2020-01-01
Supplement: d0nj00188k1.pdf [file d0nj00188k1.pdf]

# Supporting Information

---

## **Slow relaxation of magnetization for Tb derivative in a biradical-based lanthanide chain**

Xiaochun Deng, Shuqi Ma, Mei Zhu,\* Li Zhang,\* and Yaohong Lv

*Department of Chemistry, Zhejiang Sci-Tech University, Hangzhou 310018, China*

### **1. X-ray Crystallography**

**Table S1** Selected bond lengths [Å] and angles [°] for **1,2**

**Table S2** Selected bond lengths [Å] and angles [°] for **3,4**

**Fig. S1** Crystal structure of complex **1** and coordination polyhedrons of the Y(III) ion

**Fig. S2** Packing diagram of complex **1** and 2-D packing diagram through the weak intermolecular interactions

**Fig. S3** Coordination polyhedrons of the Gd(III) ion

**Fig. S4** Packing diagram of complex **2** and 2-D packing diagram through the weak intermolecular interactions

**Fig. S5** Crystal structure of complex **3** and coordination polyhedrons of the Tb(III) ion

**Fig. S6** Packing diagram of complex **3** and 2-D packing diagram through the weak intermolecular interactions

**Fig. S7** Crystal structure of complex **4** and coordination polyhedrons of the Dy(III) ion

**Fig. S8** Packing diagram of complex **4** and 2-D packing diagram through the weak intermolecular interactions

**Table S3** Lanthanide geometry analysis by using the Shape software for complexes **1-4**

### **2. Magnetic measurements**

**Fig. S9** Powder X-ray diffraction patterns of complexes **1-4**

**Scheme S1** Spin polarization mechanism for the magnetic coupling mediated by *p*-phenylene ring between two radicals.

**Fig. S10**  $\chi_M$  versus T plot of complex **3**

**Fig. S11** Field dependent magnetization of complex **2** at 2K.

**Fig. S12** Field dependent magnetization of complex **3** at 2K.

**Fig. S13** Field dependent magnetization of complex **4** at 2K.

**Fig. S14** *M* vs *H* behavior for **3** at 2 K recorded from 50 kOe to -50 kOe and back.

**Fig. S15** AC susceptibility behaviour for **3** in zero dc fields

**Fig. S16** Plots of  $\ln\tau$  versus  $T^{-1}$  fitting to the Arrhenius law for complex **3**

**Fig. S17** Cole–Cole plots for complex **3**

**Table S4** Best fitted parameters ( $\chi_T$ ,  $\chi_S$ ,  $\tau$  and  $\alpha$ ) with the extended Debye model for complex **3**

**Fig. S18** AC susceptibility behaviour for **4** in zero dc fields

**Fig. S19** AC susceptibility behaviour for **4** in 1000 dc fields

**Fig. S20** AC susceptibility behaviour for **2** in zero dc fields

**Table S1** Selected bond lengths [Å] and angles [°] for complex **1, 2**

| Complex 1        |            | Complex 2         |            |
|------------------|------------|-------------------|------------|
| Y(1)–O(1)        | 2.343(4)   | Gd(1)-O(1)        | 2.391(4)   |
| Y(1)–O(2)        | 2.323(4)   | Gd(1)-O(2)        | 2.373(4)   |
| Y(1)–O(3)        | 2.336(4)   | Gd(1)-O(3)        | 2.376(4)   |
| Y(1)–O(4)        | 2.336(4)   | Gd(1)-O(5)        | 2.355(4)   |
| O(4)-Y(1)-O(1)   | 73.62(14)  | O(5)-Gd(1)-O(1)   | 104.96(13) |
| O(4)-Y(1)-O(2)   | 105.28(14) | O(5)-Gd(1)-O(2)   | 103.72(18) |
| O(4)-Y(1)-O(3)   | 74.47(14)  | O(5)-Gd(1)-O(3)   | 79.92(17)  |
| O(4)#1-Y(1)-O(1) | 150.93(16) | O(5)#1-Gd(1)-O(1) | 150.54(14) |
| O(4)#1-Y(1)-O(2) | 90.89(14)  | O(5)#1-Gd(1)-O(2) | 91.64(14)  |
| O(4)#1-Y(1)-O(3) | 70.09(14)  | O(5)#1-Gd(1)-O(3) | 70.24(14)  |
| O(4)-Y(1)-O(4)#1 | 135.1(2)   | O(5)#1-Gd(1)-O(5) | 135.31(19) |
| N(2)-O(4)-Y(1)   | 137.4(4)   | N(1)-O(5)-Gd(1)   | 122.5(4)   |

**Table S2** Selected bond lengths [Å] and angles [°] for complex **3, 4**

| Complex 3         |           | Complex 4         |            |
|-------------------|-----------|-------------------|------------|
| Tb(1)–O(1)        | 2.363(6)  | Dy(1)-O(1)        | 2.351(3)   |
| Tb(1)–O(2)        | 2.345(6)  | Dy(1)-O(2)        | 2.341(3)   |
| Tb(1)–O(3)        | 2.351(6)  | Dy(1)-O(3)        | 2.343(2)   |
| Tb(1)–O(4)        | 2.352(5)  | Dy(1)-O(5)        | 2.342(2)   |
| O(4)-Tb(1)-O(1)   | 74.10(19) | O(1)-Dy(1)-O(4)   | 150.48(10) |
| O(4)-Tb(1)-O(2)   | 105.1(2)  | O(2)-Dy(1)-O(4)   | 90.48(9)   |
| O(4)-Tb(1)-O(3)   | 74.1(2)   | O(4)-Dy(1)-O(3)   | 69.88(9)   |
| O(4)#2-Tb(1)-O(1) | 150.4(2)  | O(1)-Dy(1)-O(4)#1 | 74.28(10)  |
| O(4)#2-Tb(1)-O(2) | 91.5(2)   | O(2)-Dy(1)-O(4)#1 | 105.85(9)  |
| O(4)#2-Tb(1)-O(3) | 70.3(2)   | O(3)-Dy(1)-O(4)#1 | 74.57(9)   |
| O(4)-Tb(1)-O(4)#2 | 135.1(3)  | O(4)-Dy(1)-O(4)#1 | 134.84(13) |
| N(1)-O(4)-Tb(1)   | 135.9(5)  | N(1)-O(4)-Dy(1)   | 136.3(2)   |

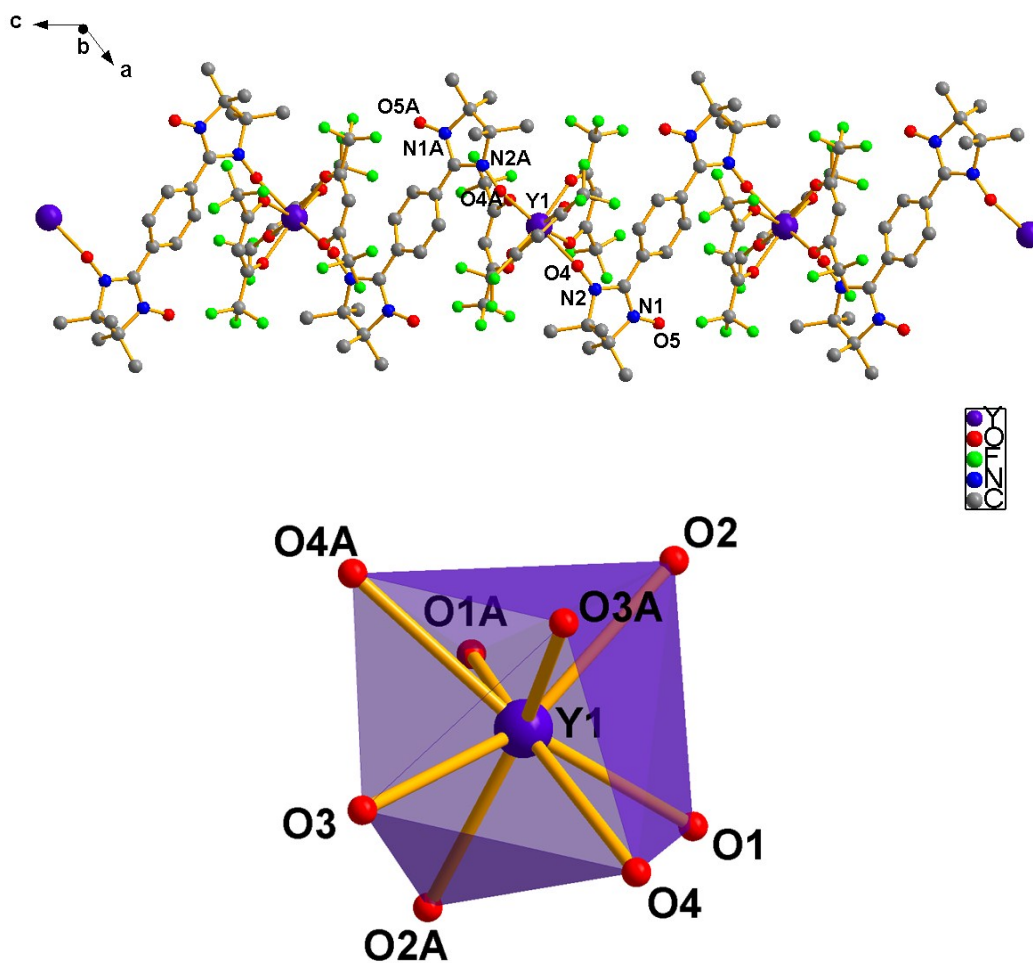

**Fig. S1** (top) Crystal structure of complex **1** (H atoms are omitted for clarity and symmetry transformations used to generate equivalent atoms A:  $x, 1-y, 1/2+z$ ); (bottom) Coordination polyhedrons of the Y(III) ion

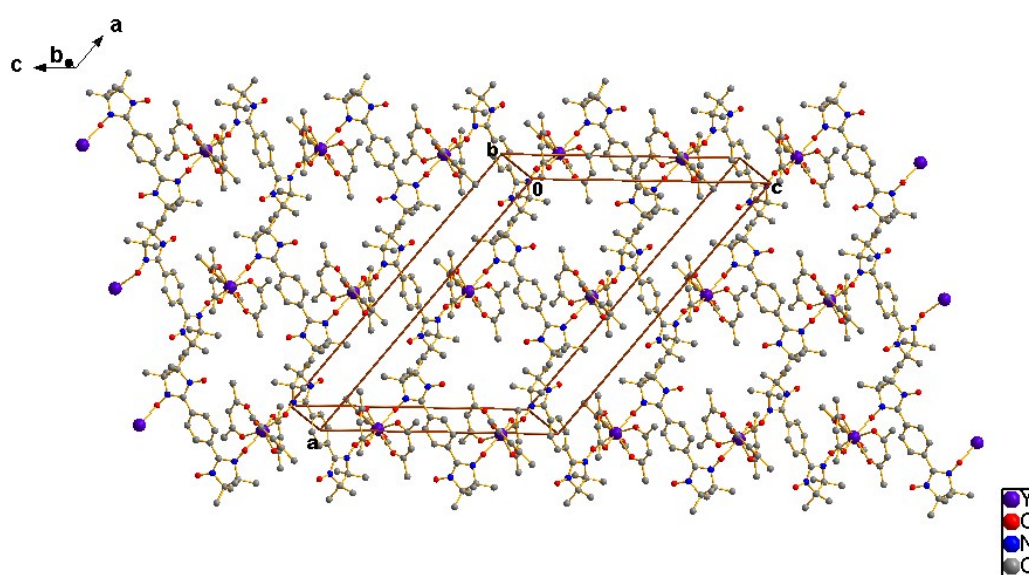

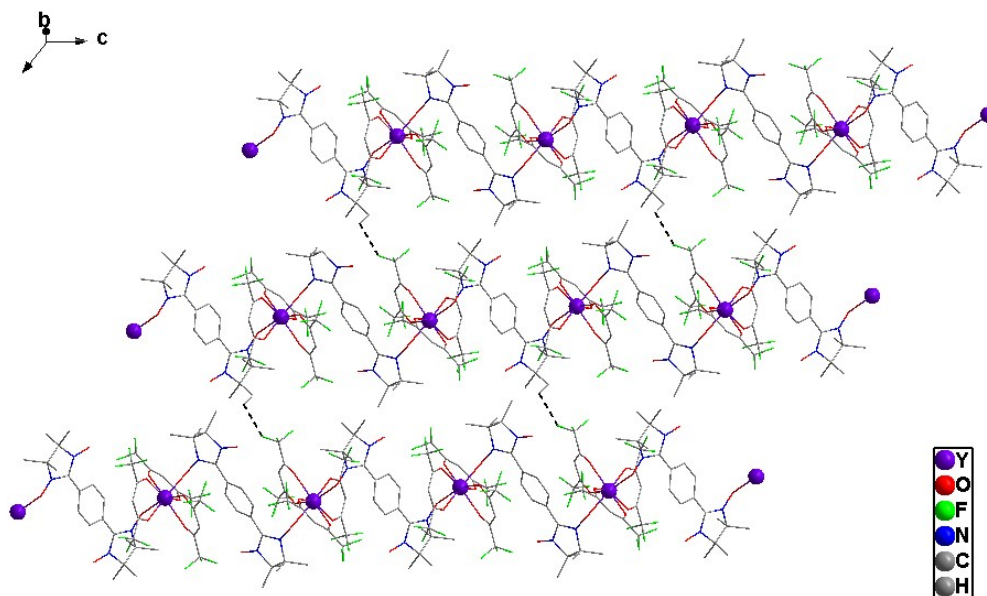

**Fig. S2** (top) Packing diagram of complex **1**. (bottom) 2-D packing diagram of **1** through the weak intermolecular interactions: C2-H2C...F7 with the distance of 2.88 Å.

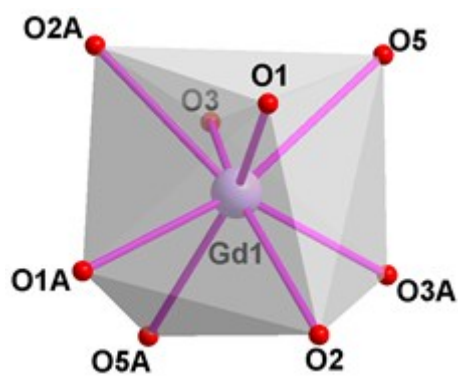

**Fig. S3** Coordination polyhedrons of the Gd(III) ion

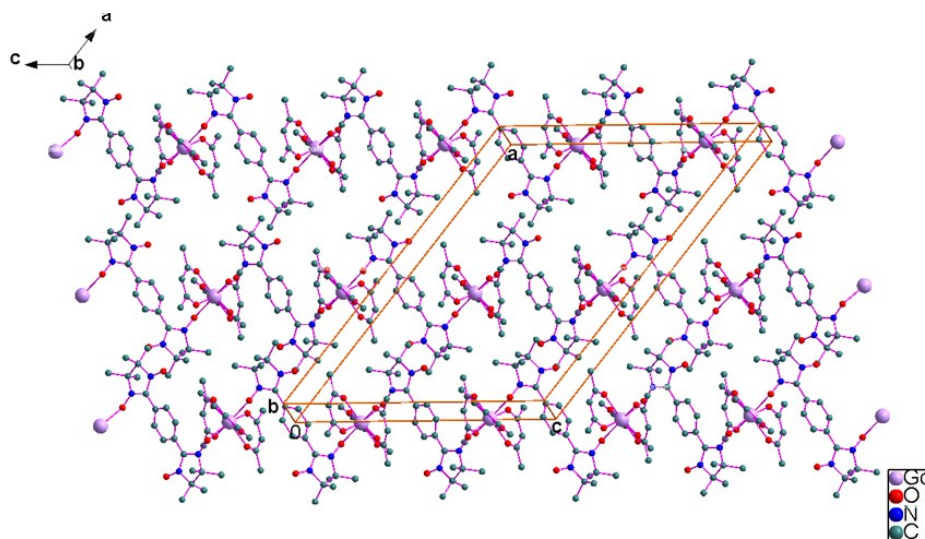

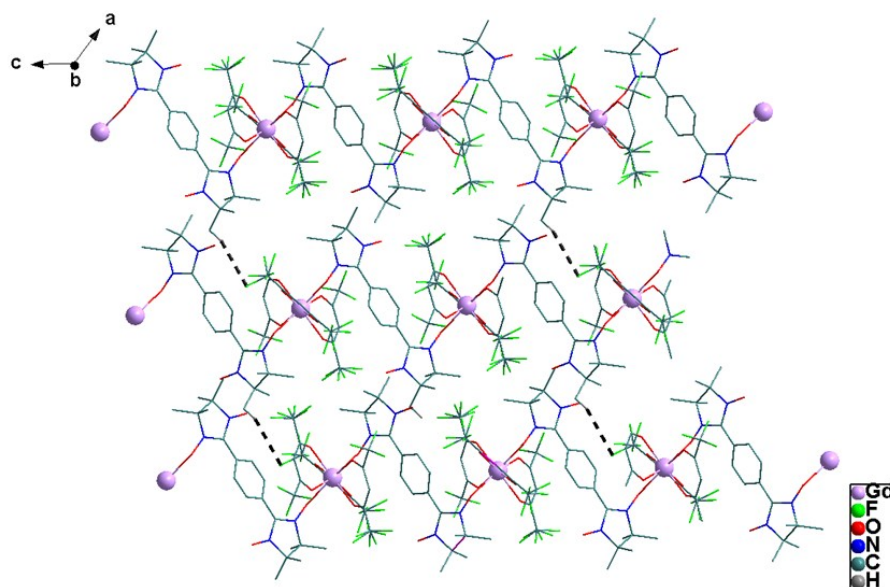

**Fig. S4** (top) Packing diagram of complex **2**; (bottom) 2-D packing diagram of **2** through the weak intermolecular interactions: C16-H16B...F9 with the distance of 3.13 Å.

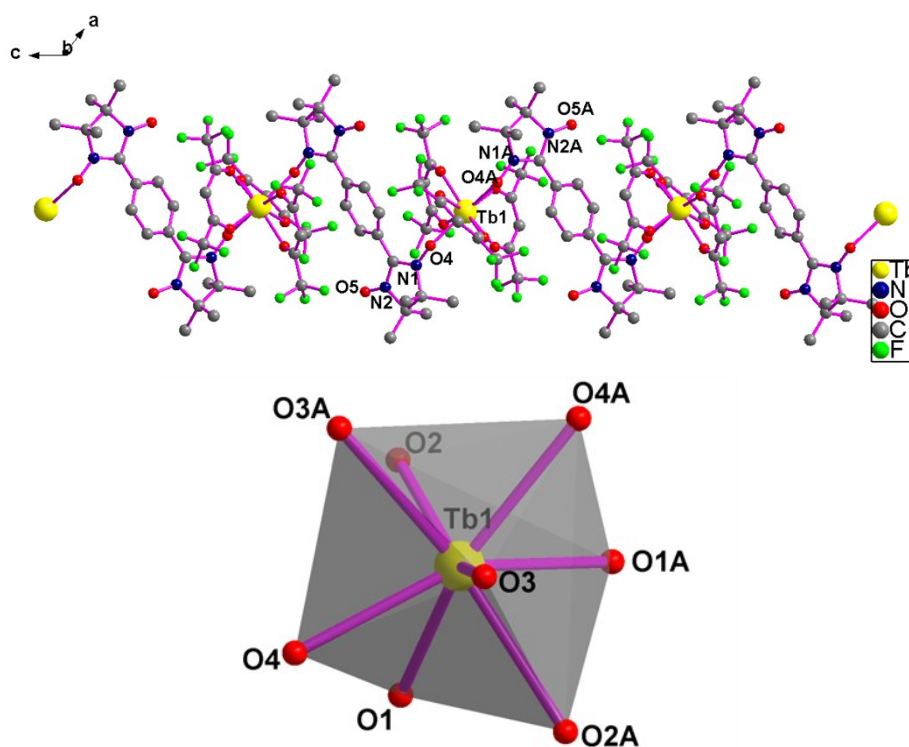

**Fig. S5** (top) Crystal structure of complex **3** (H atoms are omitted for clarity and symmetry transformations used to generate equivalent atoms A:  $-x+1, y, -z+1/2$ ); (bottom) Coordination polyhedrons of the Tb(III) ion.



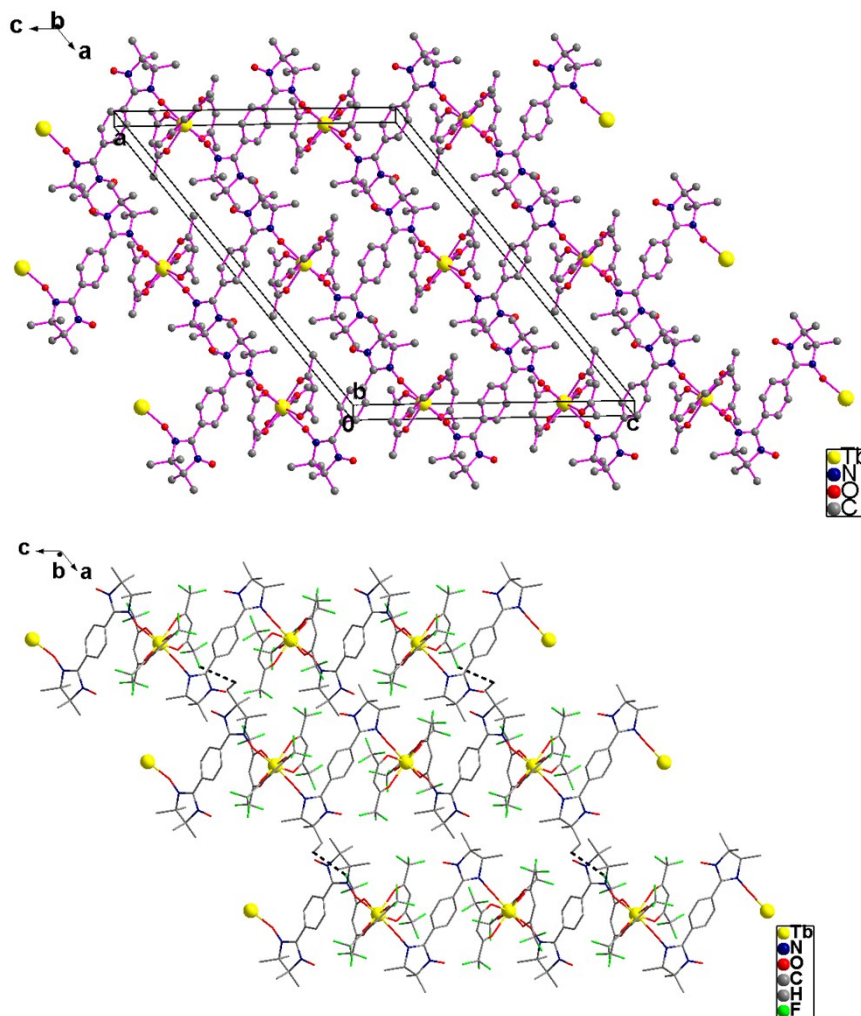

**Fig. S6** (top) Packing diagram of complex **3**; (bottom) 2-D packing diagram of **3** through the weak intermolecular interactions: C16-H16B...F5#1 with the distance of 3.317 Å.

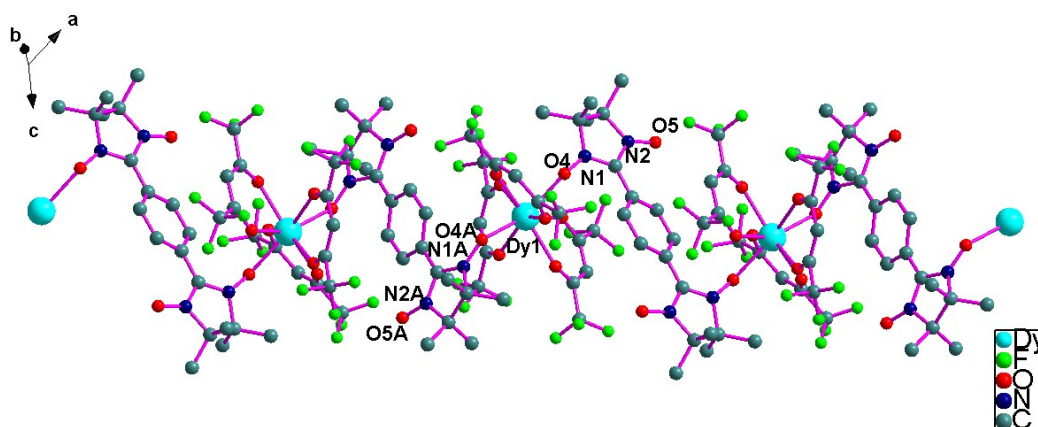

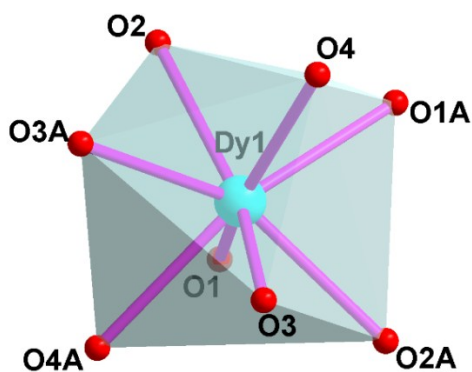

**Fig. S7** (top) Crystal structure of complex 4 (H atoms are omitted for clarity and symmetry transformations used to generate equivalent atoms A:  $-x+1,y,-z+3/2$ ); (bottom) The coordination polyhedron of Dy(III) ion.

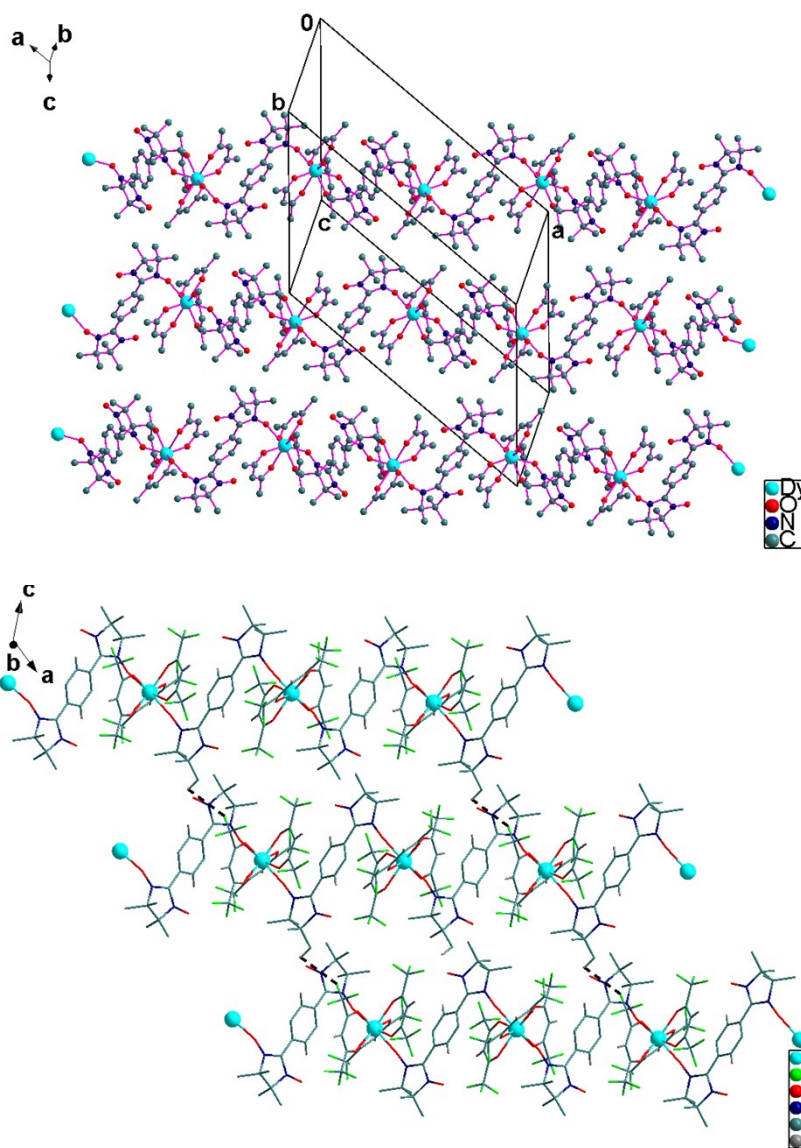

**Fig. S8** (top) Packing of the chains in crystal for complex 4; (bottom) 2D packing diagram of 4 through the weak intermolecular interactions: C18-H18C...F1 with the distance of 3.39 Å.

**Table S3.** Lanthanide geometry analysis by using the Shape software for complexes 1-4.

| Complex | Ln | $D_{4d}$ SAPR | $Oh$ CU | $C_{2v}$ JBTPR |
|---------|----|---------------|---------|----------------|
| 1       | Y  | 0.518         | 1.235   | 2.219          |
| 2       | Gd | 0.474         | 1.327   | 2.231          |
| 3       | Tb | 0.461         | 1.309   | 2.210          |
| 4       | Dy | 0.569         | 1.148   | 2.182          |

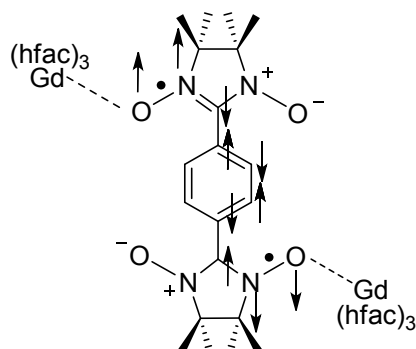

**Scheme S1** Spin polarization mechanism for the magnetic coupling mediated by *p*-phenylene ring between two radicals.

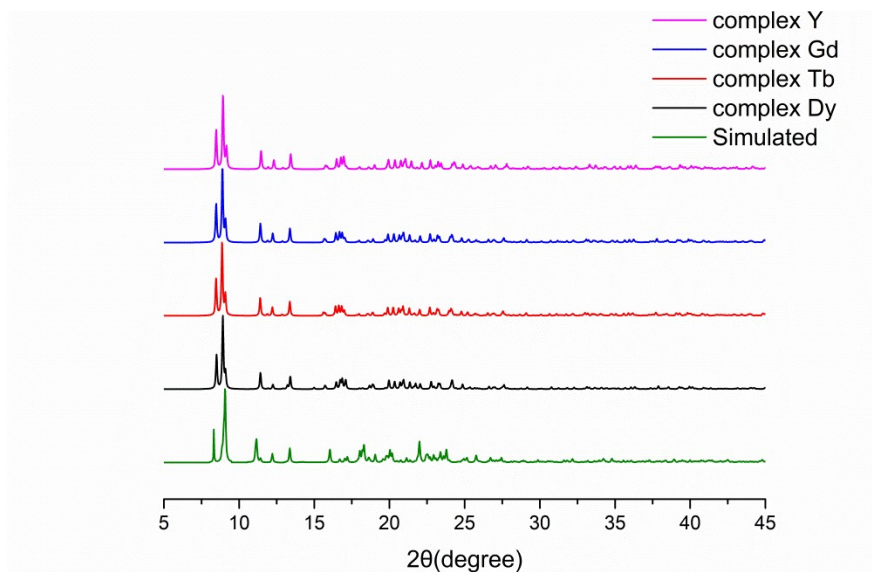

**Fig. S9** Powder X-ray diffraction patterns of complexes 1-4.



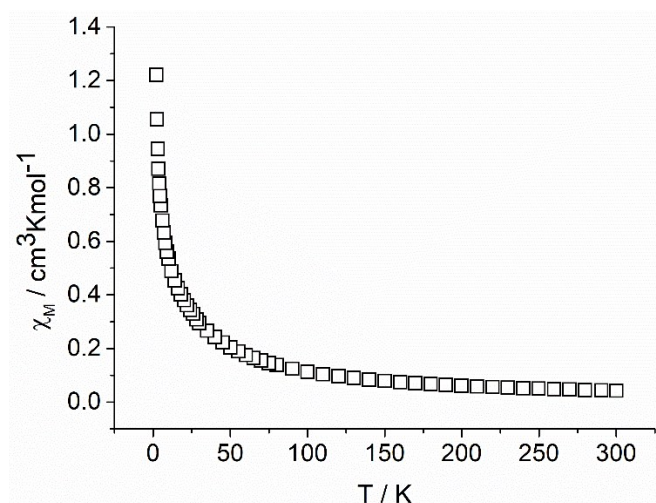

**Fig. S10**  $\chi_M$  versus T plot of complex **3**

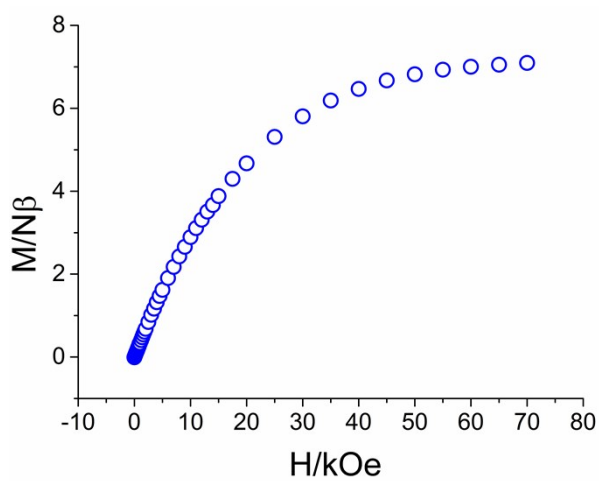

**Fig. S11** Field dependent magnetization of complex **2** at 2K.

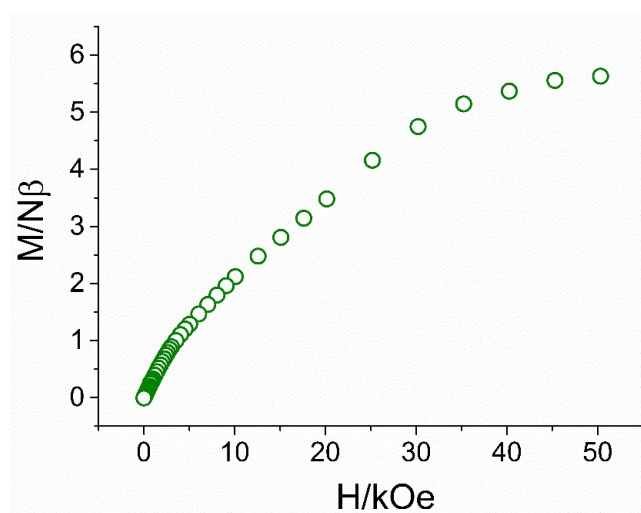

**Fig. S12** Field dependent magnetization of complex **3** at 2K.

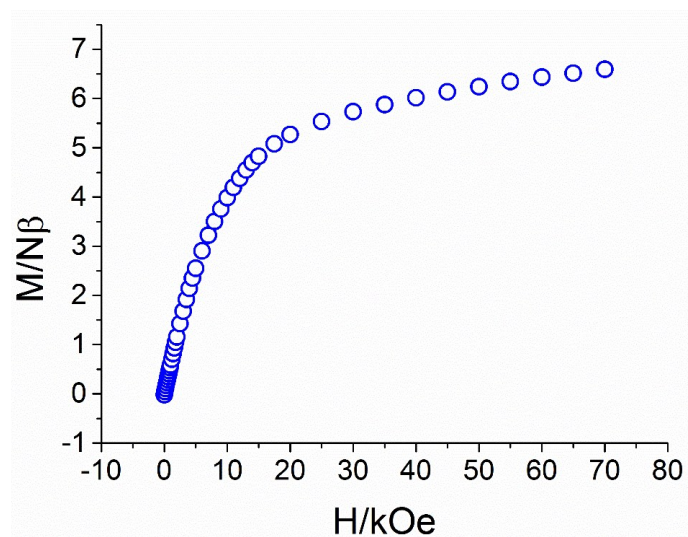

**Fig. S13** Field dependent magnetization of complex **4** at 2K.

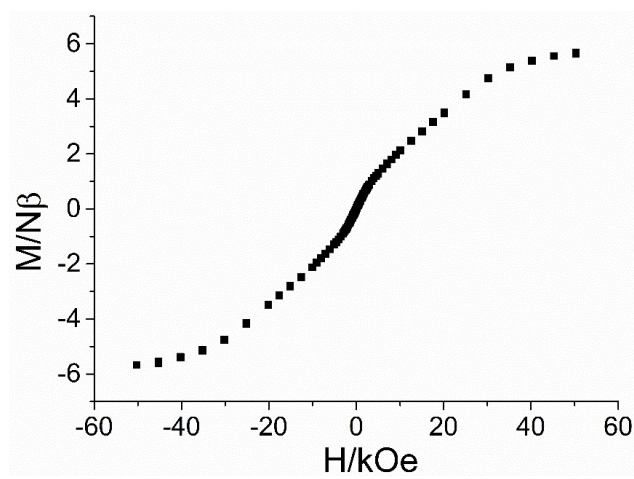

**Fig. S14**  $M$  vs  $H$  behavior for **3** at 2 K recorded from 50 kOe to -50 kOe and back.

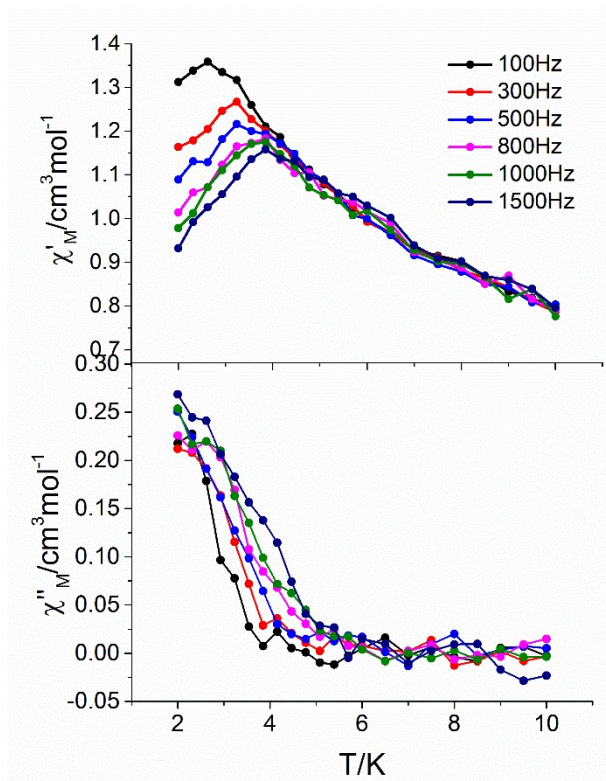

**Fig. S15** Temperature dependence of the in-phase and out-of-phase components of the ac magnetic susceptibility for **3** in zero dc fields with an oscillation of 3.5 Oe.

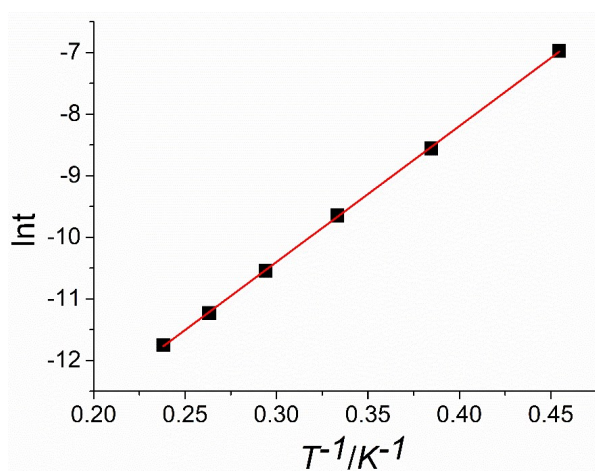

**Fig. S16** Plots of  $\ln\tau$  versus  $T^{-1}$  fitting to the Arrhenius law for complex **3**.

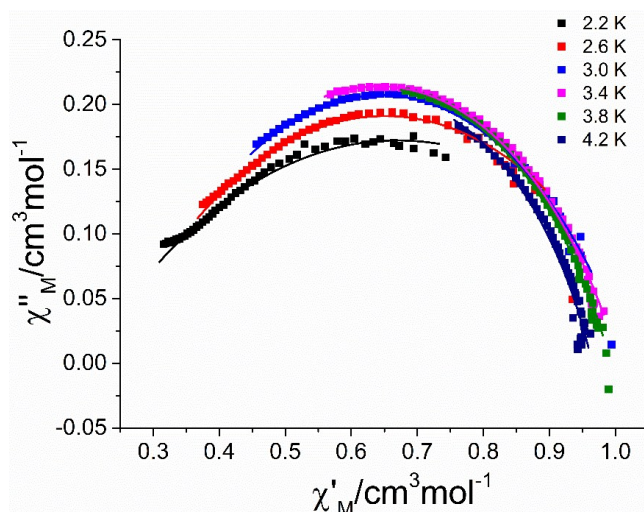

**Fig. S17** Cole–Cole plots for complex **3** (The solid lines represent the fitting result).

**Table S4** Best fitted parameters ( $\chi_T$ ,  $\chi_S$ ,  $\tau$  and  $\alpha$ ) with the extended Debye model for complex **3** under 5000 dc field in the temperature range 2.2–4.2 K.

| T/K | $\chi_S/\text{cm}^3\text{mol}^{-1}$ | $\chi_T/\text{cm}^3\text{mol}^{-1}$ | $\tau/\text{s}$       | $\alpha$ | R                     |
|-----|-------------------------------------|-------------------------------------|-----------------------|----------|-----------------------|
| 2.2 | 0.19533                             | 1.14459                             | $9.34 \times 10^{-4}$ | 0.5568   | $2.28 \times 10^{-3}$ |
| 2.6 | 0.24836                             | 1.03602                             | $1.92 \times 10^{-4}$ | 0.42412  | $3.44 \times 10^{-3}$ |
| 3.0 | 0.26858                             | 1.01861                             | $6.27 \times 10^{-5}$ | 0.35749  | $5.69 \times 10^{-3}$ |
| 3.4 | 0.27638                             | 1.00583                             | $2.63 \times 10^{-5}$ | 0.32409  | $9.68 \times 10^{-4}$ |
| 3.8 | 0.29554                             | 0.9929                              | $1.33 \times 10^{-5}$ | 0.30361  | $2.85 \times 10^{-3}$ |
| 4.2 | 0.32548                             | 0.96499                             | $7.90 \times 10^{-6}$ | 0.27185  | $2.81 \times 10^{-3}$ |

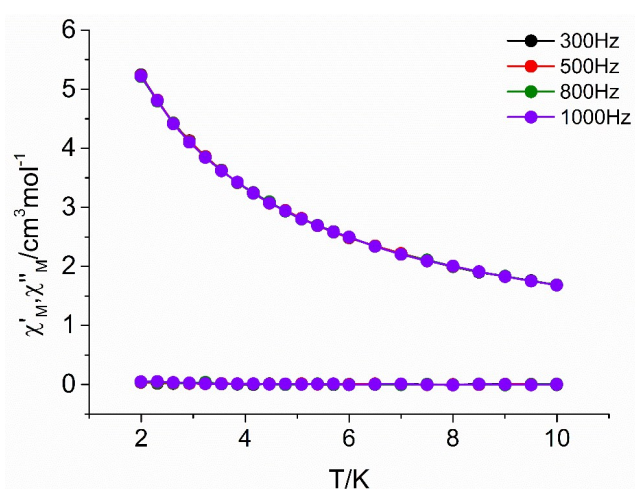

**Fig. S18** Thermal dependence of the in-phase and out-of-phase susceptibility components for compound **4** at zero direct current (dc) field with an oscillation of 3 Oe.

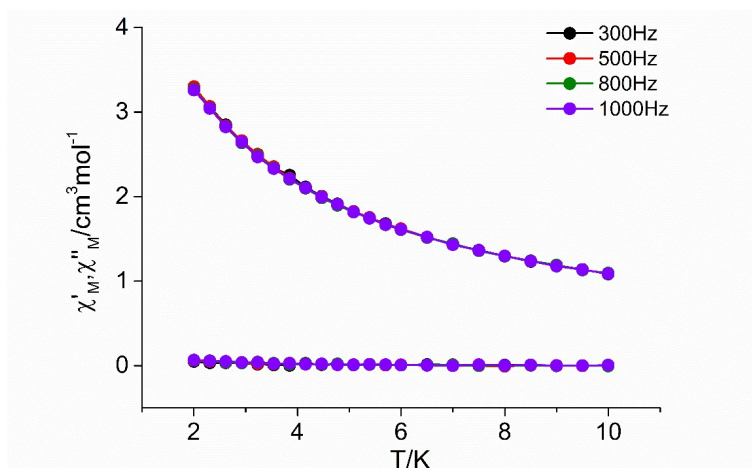

**Fig. S19** Thermal dependence of the in-phase and out-of-phase susceptibility components for compound **4** at 1000 Oe dc field with an oscillation of 3 Oe.

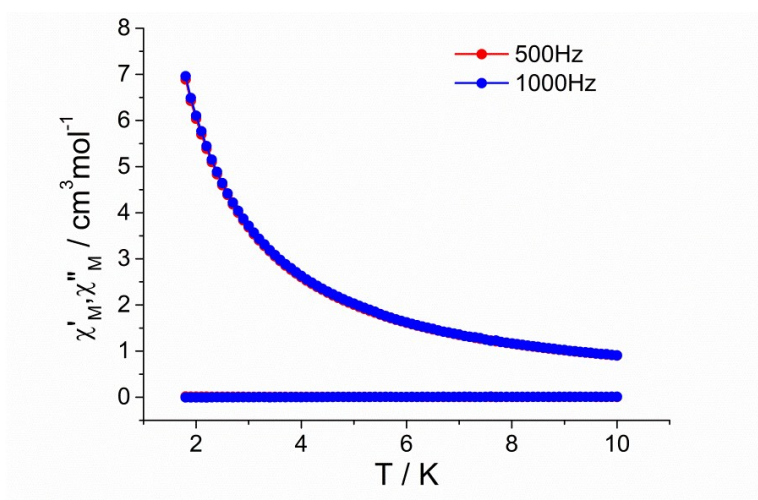

**Fig. S20** Thermal dependence of the in-phase and out-of-phase susceptibility components for compound **2** at zero direct current (dc) field with an oscillation of 3 Oe.
